# Supplementary material
Source: PubMed Central journal article supplement (PMC3013001)
Supplement: supp_M110.170852_jbc.M110.170852-1.pdf [file supp_M110.170852_jbc.M110.170852-1.pdf]

**Supplementary Table 1. List of primers used for real-time PCR analysis**

| Gene Symbol   | Forward (5' -> 3')    | Reverse (5' -> 3')   |
|---------------|-----------------------|----------------------|
| <i>FGFRL1</i> | acacagccctccaagatgag  | gcaggttcttcaggctcagt |
| <i>NDUFA4</i> | agcttgatccccctctttgt  | ctggacgttccttcttcage |
| <i>GPR177</i> | aggcatctatgggatgtgga  | ggaatattcgaagcgctga  |
| <i>LRP5L</i>  | ctcaaagctgtgaacgtgga  | gcggctctactggtgaagac |
| <i>GAPDH</i>  | gagtcaacggatttggctcgt | ttgattttggaggatctcg  |

| <b>Supplementary Table 2. The list represents 222 genes decreased by more than five-fold in miR-210-transfected cells compared with ncRNA-transfected cells</b> |                                                                                                                                                                                                                                                          |              |                |                               |
|-----------------------------------------------------------------------------------------------------------------------------------------------------------------|----------------------------------------------------------------------------------------------------------------------------------------------------------------------------------------------------------------------------------------------------------|--------------|----------------|-------------------------------|
| <b>Gene Symbol</b>                                                                                                                                              | <b>description</b>                                                                                                                                                                                                                                       | <b>ncRNA</b> | <b>miR-210</b> | <b>Log<sub>2</sub>(ratio)</b> |
| <i>IGHG3</i>                                                                                                                                                    | Immunoglobulin heavy chain C gene segment [Source:IMGT/GENE-DB;Acc:IGHG3]                                                                                                                                                                                | 41           | 1              | -5.36                         |
| <i>CYB5R3</i>                                                                                                                                                   | NADH-cytochrome b5 reductase (EC 1.6.2.2) (B5R) (Diaphorase-1) (Cytochrome b5 reductase 3) [Contains: NADH-cytochrome b5 reductase membrane-bound form; NADH-cytochrome b5 reductase soluble form]. [Source:Uniprot/SWISSPROT;Acc:P00387]                | 40           | 1              | -5.32                         |
| <i>FAM19A4</i>                                                                                                                                                  | [Source:Uniprot/SWISSPROT;Acc:Q96LR4]                                                                                                                                                                                                                    | 39           | 1              | -5.29                         |
| <i>COBL</i>                                                                                                                                                     | Protein cordon-bleu. [Source:Uniprot/SWISSPROT;Acc:O75128]                                                                                                                                                                                               | 37           | 1              | -5.21                         |
| <i>BST2</i>                                                                                                                                                     | Bone marrow stromal antigen 2 precursor (BST-2) (CD317 antigen) (HM1.24 antigen). [Source:Uniprot/SWISSPROT;Acc:Q10589]                                                                                                                                  | 35           | 1              | -5.13                         |
| <i>ONCO_HUMAN</i>                                                                                                                                               | Oncomodulin (OM) (Parvalbumin beta). [Source:Uniprot/SWISSPROT;Acc:P32930]                                                                                                                                                                               | 35           | 1              | -5.13                         |
| <i>POU3F1</i>                                                                                                                                                   | POU domain, class 3, transcription factor 1 (Octamer-binding transcription factor 6) (Oct-6) (POU domain transcription factor SCIP). [Source:Uniprot/SWISSPROT;Acc:Q03052]                                                                               | 35           | 1              | -5.13                         |
| <i>PTPRT</i>                                                                                                                                                    | Receptor-type tyrosine-protein phosphatase T precursor (EC 3.1.3.48) (R-PTP-T) (RPTP-rho). [Source:Uniprot/SWISSPROT;Acc:O14522]                                                                                                                         | 34           | 1              | -5.09                         |
| <i>PROM1</i>                                                                                                                                                    | Prominin-1 precursor (Prominin-like protein 1) (Antigen AC133) (CD133 antigen). [Source:Uniprot/SWISSPROT;Acc:O43490]                                                                                                                                    | 33           | 1              | -5.04                         |
| <i>ARTS1_HUMAN</i>                                                                                                                                              | (Aminopeptidase PILS) (Puromycin-insensitive leucyl- specific aminopeptidase) (PILS-AP) (Type 1 tumor necrosis factor receptor shedding aminopeptidase regulator). [Source:Uniprot/SWISSPROT;Acc:Q9NZ08]                                                 | 29           | 1              | -4.86                         |
| <i>Q96I54_HUMAN</i>                                                                                                                                             | -                                                                                                                                                                                                                                                        | 28           | 1              | -4.81                         |
| <i>CALN1</i>                                                                                                                                                    | Calneuron-1 (Calcium-binding protein CaBP8). [Source:Uniprot/SWISSPROT;Acc:Q9BXU9]                                                                                                                                                                       | 28           | 1              | -4.81                         |
| <i>UGT2B4</i>                                                                                                                                                   | UDP-glucuronosyltransferase 2B4 precursor (EC 2.4.1.17) (UDPGT) (Hyodeoxycholic acid) (HLUG25) (UDPGT-1). [Source:Uniprot/SWISSPROT;Acc:P06133]                                                                                                          | 27           | 1              | -4.75                         |
| <i>GABRB1</i>                                                                                                                                                   | Gamma-aminobutyric-acid receptor subunit beta-1 precursor (GABA(A) receptor subunit beta-1). [Source:Uniprot/SWISSPROT;Acc:P18505]                                                                                                                       | 26           | 1              | -4.7                          |
| <i>DFFB</i>                                                                                                                                                     | DNA fragmentation factor subunit beta (EC 3.-.-.-) (DNA fragmentation factor 40 kDa subunit) (DFF-40) (Caspase-activated deoxyribonuclease) (Caspase-activated DNase) (CAD) (Caspase-activated nuclease) (CPAN). [Source:Uniprot/SWISSPROT;Acc:O76075]   | 26           | 1              | -4.7                          |
| <i>GABRD</i>                                                                                                                                                    | Gamma-aminobutyric-acid receptor subunit delta precursor (GABA(A) receptor subunit delta). [Source:Uniprot/SWISSPROT;Acc:O14764]                                                                                                                         | 26           | 1              | -4.7                          |
| <i>Q5JV89_HUMAN</i>                                                                                                                                             | -                                                                                                                                                                                                                                                        | 25           | 1              | -4.64                         |
| <i>MANEAL</i>                                                                                                                                                   | mannosidase, endo-alpha-like isoform 2 [Source:RefSeq_peptide;Acc:NP_689709]                                                                                                                                                                             | 25           | 1              | -4.64                         |
| <i>MEGF6</i>                                                                                                                                                    | Multiple epidermal growth factor-like domains 6 precursor (EGF-like domain-containing protein 3) (Multiple EGF-like domain protein 3). [Source:Uniprot/SWISSPROT;Acc:O75095]                                                                             | 24           | 1              | -4.58                         |
| <i>TIMP4</i>                                                                                                                                                    | Metalloproteinase inhibitor 4 precursor (TIMP-4) (Tissue inhibitor of metalloproteinases 4). [Source:Uniprot/SWISSPROT;Acc:Q99727]                                                                                                                       | 23           | 1              | -4.52                         |
| <i>TNFAIP6</i>                                                                                                                                                  | Tumor necrosis factor-inducible protein TSG-6 precursor (TNF- stimulated gene 6 protein) (Hyaluronate-binding protein). [Source:Uniprot/SWISSPROT;Acc:P98066]                                                                                            | 23           | 1              | -4.52                         |
| <i>IL24</i>                                                                                                                                                     | Interleukin-24 precursor (Suppression of tumorigenicity 16 protein) (Melanoma differentiation-associated gene 7 protein) (MDA-7). [Source:Uniprot/SWISSPROT;Acc:Q13007]                                                                                  | 23           | 1              | -4.52                         |
| <i>Q8NHA6_HUMAN</i>                                                                                                                                             | Seven transmembrane helix receptor. [Source:Uniprot/SPTREMBL;Acc:Q8NHA6]                                                                                                                                                                                 | 23           | 1              | -4.52                         |
| <i>PDE1B</i>                                                                                                                                                    | Calcium/calmodulin-dependent 3',5'-cyclic nucleotide phosphodiesterase 1B (EC 3.1.4.17) (Cam-PDE 1B) (63 kDa Cam-PDE). [Source:Uniprot/SWISSPROT;Acc:Q01064]                                                                                             | 23           | 1              | -4.52                         |
| <i>EHBPI1</i>                                                                                                                                                   | Signal-induced proliferation-associated protein 1 (Sipa-1) (GTPase- activating protein Spa-1) (p130 SPA-1). [Source:Uniprot/SWISSPROT;Acc:Q96FS4]                                                                                                        | 22           | 1              | -4.46                         |
| <i>C14orf174</i>                                                                                                                                                | C14orf174 protein. [Source:Uniprot/SPTREMBL;Acc:Q2M3P3]                                                                                                                                                                                                  | 43           | 2              | -4.43                         |
| <i>PLEKHG1</i>                                                                                                                                                  | [Source:Uniprot/SWISSPROT;Acc:Q9ULL1]                                                                                                                                                                                                                    | 21           | 1              | -4.39                         |
| <i>ASTN1</i>                                                                                                                                                    | Astrotactin-1 precursor. [Source:Uniprot/SWISSPROT;Acc:O14525]                                                                                                                                                                                           | 20           | 1              | -4.32                         |
| <i>PSG1</i>                                                                                                                                                     | Pregnancy-specific beta-1-glycoprotein 1 precursor (PSBG-1) (Pregnancy-specific beta-1 glycoprotein C/D) (PS-beta-C/D) (Fetal liver non-specific cross-reactive antigen 1/2) (FL-NCA-1/2) (PSG95) (CD66f antigen). [Source:Uniprot/SWISSPROT;Acc:P11464] | 20           | 1              | -4.32                         |
| <i>SLC6A20</i>                                                                                                                                                  | Sodium- and chloride-dependent transporter XTRP3 (Solute carrier family 6 member 20) (Neurotransmitter transporter rB21A homolog). [Source:Uniprot/SWISSPROT;Acc:Q9NP91]                                                                                 | 20           | 1              | -4.32                         |
| <i>LRRN1</i>                                                                                                                                                    | Leucine-rich repeat neuronal protein 1 precursor (Neuronal leucine- rich repeat protein 1) (NLRR-1). [Source:Uniprot/SWISSPROT;Acc:Q6UXK5]                                                                                                               | 39           | 2              | -4.29                         |
| <i>IFT57</i>                                                                                                                                                    | estrogen-related receptor beta like 1 [Source:RefSeq_peptide;Acc:NP_060480]                                                                                                                                                                              | 19           | 1              | -4.25                         |
| <i>Q96LL3_HUMAN</i>                                                                                                                                             | CDNA FLJ25404 fis, clone TST02888 (Hypothetical protein FLJ25404). [Source:Uniprot/SPTREMBL;Acc:Q96LL3]                                                                                                                                                  | 19           | 1              | -4.25                         |
| <i>COCH</i>                                                                                                                                                     | Cochlin precursor (COCH-5B2). [Source:Uniprot/SWISSPROT;Acc:O43405]                                                                                                                                                                                      | 19           | 1              | -4.25                         |
| <i>NP_683701.2</i>                                                                                                                                              | GREB1 protein isoform b [Source:RefSeq_peptide;Acc:NP_149081]                                                                                                                                                                                            | 19           | 1              | -4.25                         |
| <i>Q8NAW6_HUMAN</i>                                                                                                                                             | CDNA FLJ34651 fis, clone KIDNE2018167. [Source:Uniprot/SPTREMBL;Acc:Q8NAW6]                                                                                                                                                                              | 19           | 1              | -4.25                         |
| <i>TAF6L</i>                                                                                                                                                    | TAF6-like RNA polymerase II p300/CBP-associated factor-associated factor 65 kDa subunit 6L (PCAF-associated factor 65 alpha) (PAF65- alpha). [Source:Uniprot/SWISSPROT;Acc:Q9Y6J9]                                                                       | 18           | 1              | -4.17                         |
| <i>TMPRSS12</i>                                                                                                                                                 | transmembrane protease, serine 12 [Source:RefSeq_peptide;Acc:NP_872365]                                                                                                                                                                                  | 18           | 1              | -4.17                         |
| <i>Q8NAT4_HUMAN</i>                                                                                                                                             | CDNA FLJ34815 fis, clone NT2NE2007786. [Source:Uniprot/SPTREMBL;Acc:Q8NAT4]                                                                                                                                                                              | 17           | 1              | -4.09                         |
| <i>SLC12A3</i>                                                                                                                                                  | Solute carrier family 12 member 3 (Thiazide-sensitive sodium-chloride cotransporter) (Na-Cl symporter). [Source:Uniprot/SWISSPROT;Acc:P55017]                                                                                                            | 17           | 1              | -4.09                         |
| <i>CDON</i>                                                                                                                                                     | Cell adhesion molecule-related/down-regulated by oncogenes precursor. [Source:Uniprot/SWISSPROT;Acc:Q4KMG0]                                                                                                                                              | 17           | 1              | -4.09                         |
| <i>SGCG</i>                                                                                                                                                     | Gamma-sarcoglycan (Gamma-SG) (35 kDa dystrophin-associated glycoprotein) (35DAG). [Source:Uniprot/SWISSPROT;Acc:Q13326]                                                                                                                                  | 17           | 1              | -4.09                         |
| <i>DCDC2</i>                                                                                                                                                    | [Source:Uniprot/SWISSPROT;Acc:Q9UHG0]                                                                                                                                                                                                                    | 17           | 1              | -4.09                         |

| <b>Supplementary Table 2. The list represents 222 genes decreased by more than five-fold in miR-210-tansfected cells compared with ncRNA-tansfected cells</b> |                                                                                                                                                                                                                                                                     |              |                |                               |
|---------------------------------------------------------------------------------------------------------------------------------------------------------------|---------------------------------------------------------------------------------------------------------------------------------------------------------------------------------------------------------------------------------------------------------------------|--------------|----------------|-------------------------------|
| <b>Gene Symbol</b>                                                                                                                                            | <b>description</b>                                                                                                                                                                                                                                                  | <b>ncRNA</b> | <b>miR-210</b> | <b>Log<sub>2</sub>(ratio)</b> |
| <i>PTF1A</i>                                                                                                                                                  | Pancreas transcription factor 1 subunit alpha (Pancreas-specific transcription factor 1a) (bHLH transcription factor p48) (p48 DNA-binding subunit of transcription factor PTF1) (PTF1-p48). [Source:Uniprot/SWISSPROT;Acc:Q7RTS3]                                  | 34           | 2              | -4.09                         |
| <i>IGSF5</i>                                                                                                                                                  | IGSF5 protein (Fragment). [Source:Uniprot/SPTREMBL;Acc:Q9NSI5]                                                                                                                                                                                                      | 17           | 1              | -4.09                         |
| <i>TECTA</i>                                                                                                                                                  | Alpha-tectorin precursor. [Source:Uniprot/SWISSPROT;Acc:O75443]                                                                                                                                                                                                     | 17           | 1              | -4.09                         |
| <i>LRTM2</i>                                                                                                                                                  | Leucine-rich repeat and transmembrane domain-containing protein 2 precursor. [Source:Uniprot/SWISSPROT;Acc:Q8N967]                                                                                                                                                  | 16           | 1              | -4                            |
| <i>MYT1L</i>                                                                                                                                                  | Myelin transcription factor 1-like protein (MyT1L protein) (MyT1-L). [Source:Uniprot/SWISSPROT;Acc:Q9UL68]                                                                                                                                                          | 16           | 1              | -4                            |
| <i>Q9H5H6_HUMAN</i>                                                                                                                                           | CDNA: FLJ23429 fis, clone HRC10578. [Source:Uniprot/SPTREMBL;Acc:Q9H5H6]                                                                                                                                                                                            | 16           | 1              | -4                            |
| <i>LIX1</i>                                                                                                                                                   | Protein limb expression 1 homolog. [Source:Uniprot/SWISSPROT;Acc:Q8N485]                                                                                                                                                                                            | 32           | 2              | -4                            |
| <i>FSTL5</i>                                                                                                                                                  | Follistatin-related protein 5 precursor (Follistatin-like 5). [Source:Uniprot/SWISSPROT;Acc:Q8N475]                                                                                                                                                                 | 16           | 1              | -4                            |
| <i>SEMG2</i>                                                                                                                                                  | Semenogelin-2 precursor (Semenogelin II) (SGII). [Source:Uniprot/SWISSPROT;Acc:Q02383]                                                                                                                                                                              | 15           | 1              | -3.91                         |
| <i>Q16653-6</i>                                                                                                                                               | [Source:RefSeq_peptide;Acc:NP_996536]                                                                                                                                                                                                                               | 15           | 1              | -3.91                         |
| <i>Q4VXH5_HUMAN</i>                                                                                                                                           | XAGE-4 protein (Fragment). [Source:Uniprot/SPTREMBL;Acc:Q8WWM0]                                                                                                                                                                                                     | 15           | 1              | -3.91                         |
| <i>SERPINA2</i>                                                                                                                                               | Alpha-1-antitrypsin-related protein precursor. [Source:Uniprot/SWISSPROT;Acc:P20848]                                                                                                                                                                                | 15           | 1              | -3.91                         |
| <i>GSDMDC1</i>                                                                                                                                                | Gasdermin domain-containing protein 1. [Source:Uniprot/SWISSPROT;Acc:P57764]                                                                                                                                                                                        | 15           | 1              | -3.91                         |
| <i>Q8TBU5_HUMAN</i>                                                                                                                                           | -                                                                                                                                                                                                                                                                   | 14           | 1              | -3.81                         |
| <i>ZNF83</i>                                                                                                                                                  | Zinc finger protein 83 (Zinc finger protein HPF1). [Source:Uniprot/SWISSPROT;Acc:P51522]                                                                                                                                                                            | 14           | 1              | -3.81                         |
| <i>REG1A</i>                                                                                                                                                  | Lithostathine 1 alpha precursor (Pancreatic stone protein) (PSP) (Pancreatic thread protein) (PTP) (Islet of Langerhans regenerating protein) (REG) (Regenerating protein I alpha) (Islet cells regeneration factor) (ICRF). [Source:Uniprot/SWISSPROT;Acc:P05451]  | 14           | 1              | -3.81                         |
| <i>GRIP1</i>                                                                                                                                                  | [Source:Uniprot/SWISSPROT;Acc:Q9Y3R0]                                                                                                                                                                                                                               | 28           | 2              | -3.81                         |
| <i>FGFRL1</i>                                                                                                                                                 | Fibroblast growth factor receptor-like 1 precursor (FGF receptor-like protein 1) (Fibroblast growth factor receptor 5) (FGFR-like protein) (FGF homologous factor receptor). [Source:Uniprot/SWISSPROT;Acc:Q8N441]                                                  | 277          | 21             | -3.72                         |
| <i>SHBG</i>                                                                                                                                                   | Sex hormone-binding globulin precursor (SHBG) (Sex steroid-binding protein) (SBP) (Testis-specific androgen-binding protein) (ABP) (Testosterone-estrogen-binding globulin) (Testosterone-estradiol-binding globulin) (TeBG). [Source:Uniprot/SWISSPROT;Acc:P04278] | 13           | 1              | -3.7                          |
| <i>PPIL2</i>                                                                                                                                                  | Peptidyl-prolyl cis-trans isomerase-like 2 (EC 5.2.1.8) (PP1ase) (Rotamase) (Cyclophilin-60) (Cyclophilin-like protein Cyp-60). [Source:Uniprot/SWISSPROT;Acc:Q13356]                                                                                               | 13           | 1              | -3.7                          |
| <i>IGSF21</i>                                                                                                                                                 | Immunoglobulin superfamily member 21 precursor. [Source:Uniprot/SWISSPROT;Acc:Q96ID5]                                                                                                                                                                               | 26           | 2              | -3.7                          |
| <i>IL21</i>                                                                                                                                                   | Interleukin-21 precursor (IL-21) (Za11). [Source:Uniprot/SWISSPROT;Acc:Q9HBE4]                                                                                                                                                                                      | 13           | 1              | -3.7                          |
| <i>CLIC6</i>                                                                                                                                                  | Chloride intracellular channel 6. [Source:Uniprot/SWISSPROT;Acc:Q96NY7]                                                                                                                                                                                             | 13           | 1              | -3.7                          |
| <i>SLITRK2</i>                                                                                                                                                | SLIT and NTRK-like protein 2 precursor. [Source:Uniprot/SWISSPROT;Acc:Q9H156]                                                                                                                                                                                       | 12           | 1              | -3.58                         |
| <i>RIMS1</i>                                                                                                                                                  | Regulating synaptic membrane exocytosis protein 1 (Rab3-interacting molecule 1) (RIM 1). [Source:Uniprot/SWISSPROT;Acc:Q86UR5]                                                                                                                                      | 12           | 1              | -3.58                         |
| <i>LAYN</i>                                                                                                                                                   | Layilin precursor. [Source:Uniprot/SWISSPROT;Acc:Q6UX15]                                                                                                                                                                                                            | 12           | 1              | -3.58                         |
| <i>ASB17</i>                                                                                                                                                  | Ankyrin repeat and SOCS box protein 17 (ASB-17). [Source:Uniprot/SWISSPROT;Acc:Q8WXJ9]                                                                                                                                                                              | 12           | 1              | -3.58                         |
| <i>RAD21L1</i>                                                                                                                                                | Syntaphilin. [Source:Uniprot/SWISSPROT;Acc:O15079]                                                                                                                                                                                                                  | 12           | 1              | -3.58                         |
| <i>FGF23</i>                                                                                                                                                  | Fibroblast growth factor 23 precursor (FGF-23) (Tumor-derived hypophosphatemia-inducing factor). [Source:Uniprot/SWISSPROT;Acc:Q9GZV9]                                                                                                                              | 12           | 1              | -3.58                         |
| <i>CAMTA1</i>                                                                                                                                                 | Calmodulin-binding transcription activator 1. [Source:Uniprot/SWISSPROT;Acc:Q9Y6Y1]                                                                                                                                                                                 | 23           | 2              | -3.52                         |
| <i>APOA2</i>                                                                                                                                                  | Apolipoprotein A-II precursor (ApoA-II) (ApoA-II) [Contains: Apolipoprotein A-II(1-76)]. [Source:Uniprot/SWISSPROT;Acc:P02652]                                                                                                                                      | 11           | 1              | -3.46                         |
| <i>NP_861450.1</i>                                                                                                                                            | LOC283537 protein (OTTHUMP0000018184). [Source:Uniprot/SPTREMBL;Acc:Q6P9B3]                                                                                                                                                                                         | 11           | 1              | -3.46                         |
| <i>NDUFA5</i>                                                                                                                                                 | NADH dehydrogenase [ubiquinone] 1 alpha subcomplex subunit 5 (EC 1.6.5.3) (EC 1.6.99.3) (NADH-ubiquinone oxidoreductase 13 kDa-B subunit) (Complex I-13kD-B) (CI-13kD-B) (Complex I subunit B13). [Source:Uniprot/SWISSPROT;Acc:Q16718]                             | 11           | 1              | -3.46                         |
| <i>DDO</i>                                                                                                                                                    | D-aspartate oxidase (EC 1.4.3.1) (DASOX) (DDO). [Source:Uniprot/SWISSPROT;Acc:Q99489]                                                                                                                                                                               | 22           | 2              | -3.46                         |
| <i>BCORL2</i>                                                                                                                                                 | BCoR-like protein 2 (BCL-6 corepressor-like protein 2). [Source:Uniprot/SWISSPROT;Acc:Q8N888]                                                                                                                                                                       | 11           | 1              | -3.46                         |
| <i>NM_207504</i>                                                                                                                                              | CDNA FLJ46365 fis, clone TESTI4051054. [Source:Uniprot/SPTREMBL;Acc:Q6ZRG8]                                                                                                                                                                                         | 11           | 1              | -3.46                         |
| <i>HLA-DPA1</i>                                                                                                                                               | major histocompatibility complex, class II, DP alpha 1                                                                                                                                                                                                              | 22           | 2              | -3.46                         |
| <i>CDKN1C</i>                                                                                                                                                 | Cyclin-dependent kinase inhibitor 1C (Cyclin-dependent kinase inhibitor p57) (p57KIP2). [Source:Uniprot/SWISSPROT;Acc:P49918]                                                                                                                                       | 11           | 1              | -3.46                         |
| <i>DNALI1</i>                                                                                                                                                 | Axonemal dynein light intermediate polypeptide 1 (Inner dynein arm light chain, axonemal) (hp28). [Source:Uniprot/SWISSPROT;Acc:O14645]                                                                                                                             | 11           | 1              | -3.46                         |
| <i>MCHR2</i>                                                                                                                                                  | (MCH-2R) (MCH2) (G-protein coupled receptor 145) (GPRv17). [Source:Uniprot/SWISSPROT;Acc:Q969V1]                                                                                                                                                                    | 21           | 2              | -3.39                         |
| <i>DNAH2</i>                                                                                                                                                  | dynein heavy chain domain 3 [Source:RefSeq_peptide;Acc:NP_065928]                                                                                                                                                                                                   | 21           | 2              | -3.39                         |
| <i>RTN2</i>                                                                                                                                                   | Reticulon-2 (Neuroendocrine-specific protein-like 1) (NSP-like protein 1) (NSPLI). [Source:Uniprot/SWISSPROT;Acc:O75298]                                                                                                                                            | 21           | 2              | -3.39                         |
| <i>ASIP</i>                                                                                                                                                   | [Source:Uniprot/SWISSPROT;Acc:P42127]                                                                                                                                                                                                                               | 10           | 1              | -3.32                         |
| <i>AMPH</i>                                                                                                                                                   | Amphiphysin. [Source:Uniprot/SWISSPROT;Acc:P49418]                                                                                                                                                                                                                  | 10           | 1              | -3.32                         |
| <i>FBXL21</i>                                                                                                                                                 | F-box and leucine-rich repeat protein 21 [Source:RefSeq_peptide;Acc:NP_036291]                                                                                                                                                                                      | 10           | 1              | -3.32                         |
| <i>ANGPTL2</i>                                                                                                                                                | [Source:Uniprot/SWISSPROT;Acc:Q9UKU9]                                                                                                                                                                                                                               | 30           | 3              | -3.32                         |
| <i>Q96RZ4_HUMAN</i>                                                                                                                                           | -                                                                                                                                                                                                                                                                   | 30           | 3              | -3.32                         |
| <i>C12orf50</i>                                                                                                                                               | C12orf50 protein (Fragment). [Source:Uniprot/SPTREMBL;Acc:Q6P674]                                                                                                                                                                                                   | 20           | 2              | -3.32                         |

| <b>Supplementary Table 2. The list represents 222 genes decreased by more than five-fold in miR-210-tansfected cells compared with ncRNA-tansfected cells</b> |                                                                                                                                                                                                                                                                               |              |                |                               |
|---------------------------------------------------------------------------------------------------------------------------------------------------------------|-------------------------------------------------------------------------------------------------------------------------------------------------------------------------------------------------------------------------------------------------------------------------------|--------------|----------------|-------------------------------|
| <b>Gene Symbol</b>                                                                                                                                            | <b>description</b>                                                                                                                                                                                                                                                            | <b>ncRNA</b> | <b>miR-210</b> | <b>Log<sub>2</sub>(ratio)</b> |
| <i>MSMB</i>                                                                                                                                                   | Beta-microseminoprotein precursor (Prostate secreted seminal plasma protein) (Prostate secretory protein PSP94) (PSP-94) (Seminal plasma beta-inhibin) (Immunoglobulin-binding factor) (IGBF) (PN44). [Source:Uniprot/SWISSPROT;Acc:P08118]                                   | 20           | 2              | -3.32                         |
| <i>HKR2_HUMAN</i>                                                                                                                                             | Krüppel-related zinc finger protein 2 (Protein HKR2) (Zinc finger protein 50) (Zinc finger and SCAN domain-containing protein 22) (Fragment). [Source:Uniprot/SWISSPROT;Acc:P10073]                                                                                           | 10           | 1              | -3.32                         |
| <i>HIVEP3</i>                                                                                                                                                 | [Source:RefSeq_peptide;Acc:NP_078779]                                                                                                                                                                                                                                         | 19           | 2              | -3.25                         |
| <i>GPR35</i>                                                                                                                                                  | Probable G-protein coupled receptor 35. [Source:Uniprot/SWISSPROT;Acc:Q9HC97]                                                                                                                                                                                                 | 19           | 2              | -3.25                         |
| <i>C1orf145</i>                                                                                                                                               | C1orf145 protein (Fragment). [Source:Uniprot/SPTREMBL;Acc:Q8N372]                                                                                                                                                                                                             | 19           | 2              | -3.25                         |
| <i>CBX6</i>                                                                                                                                                   | Chromobox protein homolog 6. [Source:Uniprot/SWISSPROT;Acc:O95503]                                                                                                                                                                                                            | 28           | 3              | -3.22                         |
| <i>Q9H353_HUMAN</i>                                                                                                                                           | -                                                                                                                                                                                                                                                                             | 37           | 4              | -3.21                         |
| <i>C11orf69</i>                                                                                                                                               | Uncharacterized protein C11orf69. [Source:Uniprot/SWISSPROT;Acc:Q8TAY4]                                                                                                                                                                                                       | 37           | 4              | -3.21                         |
| <i>MYF5</i>                                                                                                                                                   | Myogenic factor 5 (Myf-5). [Source:Uniprot/SWISSPROT;Acc:P13349]                                                                                                                                                                                                              | 9            | 1              | -3.17                         |
| <i>PRKAR2B</i>                                                                                                                                                | [Source:Uniprot/SWISSPROT;Acc:P31323]                                                                                                                                                                                                                                         | 9            | 1              | -3.17                         |
| <i>NOX1</i>                                                                                                                                                   | NADPH oxidase homolog 1 (NOX-1) (NOH-1) (NADH/NADPH mitogenic oxidase subunit P65-MOX) (Mitogenic oxidase 1) (MOX1). [Source:Uniprot/SWISSPROT;Acc:Q9Y5S8]                                                                                                                    | 9            | 1              | -3.17                         |
| <i>ELOVL3</i>                                                                                                                                                 | Elongation of very long chain fatty acids protein 3 (Cold-inducible glycoprotein of 30 kDa). [Source:Uniprot/SWISSPROT;Acc:Q9HB03]                                                                                                                                            | 45           | 5              | -3.17                         |
| <i>BCL2L10</i>                                                                                                                                                | Apoptosis regulator Bcl-B (Bcl-2-like 10 protein) (Bcl2-L-10) (Anti- apoptotic protein NrH). [Source:Uniprot/SWISSPROT;Acc:Q9HD36]                                                                                                                                            | 18           | 2              | -3.17                         |
| <i>SEPT8</i>                                                                                                                                                  | Septin-8. [Source:Uniprot/SWISSPROT;Acc:Q92599]                                                                                                                                                                                                                               | 18           | 2              | -3.17                         |
| <i>C17orf57</i>                                                                                                                                               | C17orf57 protein. [Source:Uniprot/SPTREMBL;Acc:Q49AG9]                                                                                                                                                                                                                        | 18           | 2              | -3.17                         |
| <i>SPANXN2</i>                                                                                                                                                | SPANX-N2 protein [Source:RefSeq_peptide;Acc:NP_001009615]                                                                                                                                                                                                                     | 9            | 1              | -3.17                         |
| <i>CHST5</i>                                                                                                                                                  | (GlcNAc6ST-3) (Intestinal GlcNAc-6- sulfotransferase) (Intestinal N-acetylglucosamine-6-O-sulfotransferase) (I-GlcNAc6ST) (hIGn6ST) (Galactose/N- acetylglucosamine [Source:Uniprot/SWISSPROT;Acc:Q9GZS9]                                                                     | 26           | 3              | -3.12                         |
| <i>DUOXA2</i>                                                                                                                                                 | [Source:Uniprot/SWISSPROT;Acc:Q1HG44]                                                                                                                                                                                                                                         | 26           | 3              | -3.12                         |
| <i>FAM26A</i>                                                                                                                                                 | Protein FAM26A. [Source:Uniprot/SWISSPROT;Acc:Q86XJ0]                                                                                                                                                                                                                         | 69           | 8              | -3.11                         |
| <i>NEURL2</i>                                                                                                                                                 | Neutralized-like protein 2. [Source:Uniprot/SWISSPROT;Acc:Q9BR09]                                                                                                                                                                                                             | 43           | 5              | -3.1                          |
| <i>TERT</i>                                                                                                                                                   | Telomerase reverse transcriptase (EC 2.7.7.49) (Telomerase catalytic subunit) (HEST2) (Telomerase-associated protein 2) (TP2). [Source:Uniprot/SWISSPROT;Acc:O14746]                                                                                                          | 34           | 4              | -3.09                         |
| <i>NDUFA4</i>                                                                                                                                                 | NADH dehydrogenase [ubiquinone] 1 alpha subcomplex subunit 4 (EC 1.6.5.3) (EC 1.6.99.3) (NADH-ubiquinone oxidoreductase MLRQ subunit) (Complex I-MLRQ) (CI-MLRQ). [Source:Uniprot/SWISSPROT;Acc:O00483]                                                                       | 4846         | 593            | -3.03                         |
| <i>ART1</i>                                                                                                                                                   | GPI-linked NAD(P)(+)-arginine ADP-ribosyltransferase 1 precursor (EC 2.4.2.31) (Mono(ADP-ribosyl)transferase) (CD296 antigen). [Source:Uniprot/SWISSPROT;Acc:P52961]                                                                                                          | 8            | 1              | -3                            |
| <i>NP_001001684.1</i>                                                                                                                                         | CDNA FLJ45831 fis, clone NT2RP8007416. [Source:Uniprot/SPTREMBL;Acc:Q6ZS49]                                                                                                                                                                                                   | 8            | 1              | -3                            |
| <i>AKAP3</i>                                                                                                                                                  | A-kinase anchor protein 3 (Protein kinase A-anchoring protein 3) (PRKA3) (A-kinase anchor protein 110 kDa) (AKAP 110) (Sperm oocyte- binding protein) (Fibrousheathin-1) (Fibrousheathin I) (Fibrous sheath protein of 95 kDa) (FSP95). [Source:Uniprot/SWISSPROT;Acc:O75969] | 8            | 1              | -3                            |
| <i>GTF2IRD2</i>                                                                                                                                               | GTF2I repeat domain containing 2 [Source:RefSeq_peptide;Acc:NP_775808]                                                                                                                                                                                                        | 8            | 1              | -3                            |
| <i>SPATA16</i>                                                                                                                                                | spermatogenesis associated 16 [Source:RefSeq_peptide;Acc:NP_114161]                                                                                                                                                                                                           | 23           | 3              | -2.94                         |
| <i>SPINLW1</i>                                                                                                                                                | Eppin precursor (Epididymal protease inhibitor) (Serine protease inhibitor-like with Kunitz and WAP domains 1) (WAP four-disulfide core domain protein 7) (Protease inhibitor WAP7). [Source:Uniprot/SWISSPROT;Acc:O95925]                                                    | 23           | 3              | -2.94                         |
| <i>OR2L2</i>                                                                                                                                                  | Olfactory receptor 2L2 (HTPCRH07). [Source:Uniprot/SWISSPROT;Acc:Q8NH16]                                                                                                                                                                                                      | 23           | 3              | -2.94                         |
| <i>HTR5A</i>                                                                                                                                                  | 5-hydroxytryptamine 5A receptor (5-HT-5A) (Serotonin receptor 5A) (5- HT-5). [Source:Uniprot/SWISSPROT;Acc:P47898]                                                                                                                                                            | 30           | 4              | -2.91                         |
| <i>CF015_HUMAN</i>                                                                                                                                            | [Source:Uniprot/SWISSPROT;Acc:Q6UXA7]                                                                                                                                                                                                                                         | 30           | 4              | -2.91                         |
| <i>Q9H7Y2_HUMAN</i>                                                                                                                                           | CDNA FLJ14100 fis, clone MAMMA1000855. [Source:Uniprot/SPTREMBL;Acc:Q9H7Y2]                                                                                                                                                                                                   | 30           | 4              | -2.91                         |
| <i>ZFP42</i>                                                                                                                                                  | zinc finger protein 42 [Source:RefSeq_peptide;Acc:NP_777560]                                                                                                                                                                                                                  | 15           | 2              | -2.91                         |
| <i>C1orf112</i>                                                                                                                                               | C1orf112 protein. [Source:Uniprot/SPTREMBL;Acc:Q3KNQ1]                                                                                                                                                                                                                        | 15           | 2              | -2.91                         |
| <i>EDAR</i>                                                                                                                                                   | Tumor necrosis factor receptor superfamily member EDAR precursor (Anhidrotic ectodysplasin receptor 1) (Ectodysplasin-A receptor) (EDA- A1 receptor) (Ectodermal dysplasia receptor) (Downless homolog). [Source:Uniprot/SWISSPROT;Acc:Q9UNE0]                                | 15           | 2              | -2.91                         |
| <i>RNF11</i>                                                                                                                                                  | RING finger protein 11 (Sid 1669). [Source:Uniprot/SWISSPROT;Acc:Q9Y3C5]                                                                                                                                                                                                      | 949          | 129            | -2.88                         |
| <i>CLDN14</i>                                                                                                                                                 | Claudin-14. [Source:Uniprot/SWISSPROT;Acc:O95500]                                                                                                                                                                                                                             | 22           | 3              | -2.87                         |
| <i>SGCZ</i>                                                                                                                                                   | Zeta-sarcoglycan (Zeta-SG) (ZSG1). [Source:Uniprot/SWISSPROT;Acc:Q96LD1]                                                                                                                                                                                                      | 29           | 4              | -2.86                         |
| <i>PLAC8</i>                                                                                                                                                  | Placenta-specific gene 8 protein (Protein C15). [Source:Uniprot/SWISSPROT;Acc:Q9NZF1]                                                                                                                                                                                         | 121          | 17             | -2.83                         |
| <i>LRRC17</i>                                                                                                                                                 | [Source:Uniprot/SWISSPROT;Acc:Q8N6Y2]                                                                                                                                                                                                                                         | 7            | 1              | -2.81                         |
| <i>PCDH7</i>                                                                                                                                                  | [Source:Uniprot/SWISSPROT;Acc:O60245]                                                                                                                                                                                                                                         | 35           | 5              | -2.81                         |
| <i>TRAV22</i>                                                                                                                                                 | T-cell receptor alpha V gene segment [Source:IMG/GENE-DB;Acc:TRAV22]                                                                                                                                                                                                          | 7            | 1              | -2.81                         |
| <i>XAB2</i>                                                                                                                                                   | XPA-binding protein 2 (HCNP protein). [Source:Uniprot/SWISSPROT;Acc:Q9HCS7]                                                                                                                                                                                                   | 35           | 5              | -2.81                         |
| <i>FCGR2A</i>                                                                                                                                                 | (IgG Fc receptor II-a) (Fc-gamma-RIIa) (CD32 antigen) (CDw32). [Source:Uniprot/SWISSPROT;Acc:P12318]                                                                                                                                                                          | 21           | 3              | -2.81                         |
| <i>SEC14L5</i>                                                                                                                                                | -                                                                                                                                                                                                                                                                             | 21           | 3              | -2.81                         |
| <i>C10orf53</i>                                                                                                                                               | Uncharacterized protein C10orf53. [Source:Uniprot/SWISSPROT;Acc:Q8N6V4]                                                                                                                                                                                                       | 21           | 3              | -2.81                         |
| <i>LOC729516</i>                                                                                                                                              | -                                                                                                                                                                                                                                                                             | 21           | 3              | -2.81                         |
| <i>SLFN1</i>                                                                                                                                                  | schlafen-like 1 [Source:RefSeq_peptide;Acc:NP_659427]                                                                                                                                                                                                                         | 14           | 2              | -2.81                         |

| <b>Supplementary Table 2. The list represents 222 genes decreased by more than five-fold in miR-210-transfected cells compared with ncRNA-transfected cells</b> |                                                                                                                                                                                                                                                  |              |                |                               |
|-----------------------------------------------------------------------------------------------------------------------------------------------------------------|--------------------------------------------------------------------------------------------------------------------------------------------------------------------------------------------------------------------------------------------------|--------------|----------------|-------------------------------|
| <b>Gene Symbol</b>                                                                                                                                              | <b>description</b>                                                                                                                                                                                                                               | <b>ncRNA</b> | <b>miR-210</b> | <b>Log<sub>2</sub>(ratio)</b> |
| <i>LRAT</i>                                                                                                                                                     | Lecithin retinol acyltransferase (EC 2.3.1.135) (Phosphatidylcholine--retinol O-acyltransferase). [Source:Uniprot/SWISSPROT;Acc:O95237]                                                                                                          | 7            | 1              | -2.81                         |
| <i>GPR177</i>                                                                                                                                                   | Integral membrane protein GPR177 precursor (Protein wntless homolog) (Putative NFkB-activating protein 373). [Source:Uniprot/SWISSPROT;Acc:Q5T9L3]                                                                                               | 817          | 121            | -2.76                         |
| <i>ADAMTS13</i>                                                                                                                                                 | ADAMTS-13 precursor (EC 3.4.24.-) (A disintegrin and metalloproteinase with thrombospondin motifs 13) (ADAM-TS 13) (ADAM-TS13) (von Willebrand factor-cleaving protease) (vWF-cleaving protease) (vWF-CP). [Source:Uniprot/SWISSPROT;Acc:Q76LX8] | 47           | 7              | -2.75                         |
| <i>PTCHD1</i>                                                                                                                                                   | patched domain containing 1 [Source:RefSeq_peptide;Acc:NP_775766]                                                                                                                                                                                | 20           | 3              | -2.74                         |
| <i>ACPL2</i>                                                                                                                                                    | acid phosphatase-like 2 [Source:RefSeq_peptide;Acc:NP_001032249]                                                                                                                                                                                 | 20           | 3              | -2.74                         |
| <i>TFEC</i>                                                                                                                                                     | transcription factor EC isoform b [Source:RefSeq_peptide;Acc:NP_001018068]                                                                                                                                                                       | 33           | 5              | -2.72                         |
| <i>STMN1</i>                                                                                                                                                    | phosphoprotein p18) (pp17) (Prosolin) (Metablastin) (Protein Pr22). [Source:Uniprot/SWISSPROT;Acc:P16949]                                                                                                                                        | 1003         | 153            | -2.71                         |
| <i>Q8WYR5_HUMAN</i>                                                                                                                                             | Tumor rejection antigen. [Source:Uniprot/SPTREMBL;Acc:Q8WYR5]                                                                                                                                                                                    | 557          | 85             | -2.71                         |
| <i>Q8NHT0_HUMAN</i>                                                                                                                                             | MGC32805 protein. [Source:Uniprot/SPTREMBL;Acc:Q8NHT0]                                                                                                                                                                                           | 26           | 4              | -2.7                          |
| <i>C20orf39</i>                                                                                                                                                 | UPF0338 protein C20orf39. [Source:Uniprot/SWISSPROT;Acc:Q9H7V2]                                                                                                                                                                                  | 26           | 4              | -2.7                          |
| <i>PSG10</i>                                                                                                                                                    | Pregnancy-specific beta-1-glycoprotein 10 precursor (PSBG-10) (PSBG-12). [Source:Uniprot/SWISSPROT;Acc:Q15235]                                                                                                                                   | 13           | 2              | -2.7                          |
| <i>GJA5</i>                                                                                                                                                     | Gap junction alpha-5 protein (Connexin-40) (Cx40). [Source:Uniprot/SWISSPROT;Acc:P36382]                                                                                                                                                         | 13           | 2              | -2.7                          |
| <i>POT15_HUMAN</i>                                                                                                                                              | [Source:Uniprot/SWISSPROT;Acc:Q6S5H4]                                                                                                                                                                                                            | 13           | 2              | -2.7                          |
| <i>NP_001008784.1</i>                                                                                                                                           | CD200 cell surface glycoprotein receptor isoform 2 [Source:RefSeq_peptide;Acc:NP_001008784]                                                                                                                                                      | 13           | 2              | -2.7                          |
| <i>PER3</i>                                                                                                                                                     | Period circadian protein homolog 3 (Circadian clock protein PERIOD 3) (hPER3). [Source:Uniprot/SWISSPROT;Acc:P56645]                                                                                                                             | 45           | 7              | -2.68                         |
| <i>TEDDM1</i>                                                                                                                                                   | putative membrane protein HE9 [Source:RefSeq_peptide;Acc:NP_741997]                                                                                                                                                                              | 44           | 7              | -2.65                         |
| <i>DOCK4</i>                                                                                                                                                    | Dedicator of cytokinesis protein 4. [Source:Uniprot/SWISSPROT;Acc:Q8N1I0]                                                                                                                                                                        | 25           | 4              | -2.64                         |
| <i>RIMS3</i>                                                                                                                                                    | Regulating synaptic membrane exocytosis protein 3 (Nim3) (Rab-3-interacting molecule 3) (RIM 3) (RIM3 gamma). [Source:Uniprot/SWISSPROT;Acc:Q9UJD0]                                                                                              | 43           | 7              | -2.62                         |
| <i>FCRL3</i>                                                                                                                                                    | Fc receptor-like 3 precursor [Source:RefSeq_peptide;Acc:NP_443171]                                                                                                                                                                               | 49           | 8              | -2.61                         |
| <i>GCKR</i>                                                                                                                                                     | Glucokinase regulatory protein (Glucokinase regulator). [Source:Uniprot/SWISSPROT;Acc:Q14397]                                                                                                                                                    | 6            | 1              | -2.58                         |
| <i>NP_631912.2</i>                                                                                                                                              | Na <sup>+</sup> /H <sup>+</sup> exchanger like domain containing [Source:RefSeq_peptide;Acc:NP_631912]                                                                                                                                           | 24           | 4              | -2.58                         |
| <i>C2orf51</i>                                                                                                                                                  | CDNA FLJ25369 fis, clone TST01830 (Hypothetical protein FLJ25369) (Chromosome 2 open reading frame 51). [Source:Uniprot/SPTREMBL;Acc:Q96LM6]                                                                                                     | 48           | 8              | -2.58                         |
| <i>EN2</i>                                                                                                                                                      | Homeobox protein engrailed-2 (Hu-En-2). [Source:Uniprot/SWISSPROT;Acc:P19622]                                                                                                                                                                    | 30           | 5              | -2.58                         |
| <i>RFPL1</i>                                                                                                                                                    | Ret finger protein-like 1 (RING finger protein 78). [Source:Uniprot/SWISSPROT;Acc:O75677]                                                                                                                                                        | 30           | 5              | -2.58                         |
| <i>GDF3</i>                                                                                                                                                     | Growth/differentiation factor 3 precursor (GDF-3). [Source:Uniprot/SWISSPROT;Acc:Q9NR23]                                                                                                                                                         | 36           | 6              | -2.58                         |
| <i>NP_775916.1</i>                                                                                                                                              | CDNA FLJ37357 fis, clone BRAMY2023060 (FLJ37357 protein) (Hypothetical protein FLJ37357). [Source:Uniprot/SPTREMBL;Acc:Q8N1W6]                                                                                                                   | 30           | 5              | -2.58                         |
| <i>ISX</i>                                                                                                                                                      | intestine-specific homeobox [Source:RefSeq_peptide;Acc:NP_001008494]                                                                                                                                                                             | 24           | 4              | -2.58                         |
| <i>CX3CR1</i>                                                                                                                                                   | CX3C chemokine receptor 1 (C-X3-C CKR-1) (CX3CR1) (Fractalkine receptor) (G-protein coupled receptor 13) (V28) (Beta chemokine receptor-like 1) (CMK-BRL-1) (CMKBRL1). [Source:Uniprot/SWISSPROT;Acc:P49238]                                     | 24           | 4              | -2.58                         |
| <i>MIA2</i>                                                                                                                                                     | Melanoma inhibitory activity protein 2 precursor. [Source:Uniprot/SWISSPROT;Acc:Q96PC5]                                                                                                                                                          | 18           | 3              | -2.58                         |
| <i>O10D4_HUMAN</i>                                                                                                                                              | Olfactory receptor 10D4. [Source:Uniprot/SWISSPROT;Acc:Q8NGN7]                                                                                                                                                                                   | 18           | 3              | -2.58                         |
| <i>OR7G2</i>                                                                                                                                                    | Olfactory receptor 7G2 (Olfactory receptor 19-13) (OR19-13) (OST260). [Source:Uniprot/SWISSPROT;Acc:Q8NG99]                                                                                                                                      | 18           | 3              | -2.58                         |
| <i>LRP2</i>                                                                                                                                                     | Low-density lipoprotein receptor-related protein 2 precursor (Megalin) (Glycoprotein 330) (gp330). [Source:Uniprot/SWISSPROT;Acc:P98164]                                                                                                         | 12           | 2              | -2.58                         |
| <i>C2orf46</i>                                                                                                                                                  | Putative uncharacterized protein C2orf46. [Source:Uniprot/SWISSPROT;Acc:Q6ZSB3]                                                                                                                                                                  | 12           | 2              | -2.58                         |
| <i>Q6ZMT9_HUMAN</i>                                                                                                                                             | [Source:Uniprot/SPTREMBL;Acc:Q6ZMT9]                                                                                                                                                                                                             | 6            | 1              | -2.58                         |
| <i>CIQTNF2</i>                                                                                                                                                  | Complement C1q tumor necrosis factor-related protein 2 precursor. [Source:Uniprot/SWISSPROT;Acc:Q9BXJ5]                                                                                                                                          | 6            | 1              | -2.58                         |
| <i>SERHL2</i>                                                                                                                                                   | Serine hydrolase-like protein 2 (EC 3.1.-.-). [Source:Uniprot/SWISSPROT;Acc:Q9H4I8]                                                                                                                                                              | 64           | 11             | -2.54                         |
| <i>USHBP1</i>                                                                                                                                                   | USH1C-binding protein 1 (Usher syndrome type-1C protein-binding protein 1) (MCC-2) (AIE-75-binding protein). [Source:Uniprot/SWISSPROT;Acc:Q8N6Y0]                                                                                               | 29           | 5              | -2.54                         |
| <i>VSTM2</i>                                                                                                                                                    | [Source:Uniprot/SWISSPROT;Acc:Q8TAG5]                                                                                                                                                                                                            | 23           | 4              | -2.52                         |
| <i>AGC1</i>                                                                                                                                                     | sulfate proteoglycan core protein 1 [Contains: Aggrecan core protein 2]. [Source:Uniprot/SWISSPROT;Acc:P16112]                                                                                                                                   | 23           | 4              | -2.52                         |
| <i>BPY2C</i>                                                                                                                                                    | [Source:Uniprot/SWISSPROT;Acc:O14599]                                                                                                                                                                                                            | 23           | 4              | -2.52                         |
| <i>DDOST</i>                                                                                                                                                    | Dolichyl-diphosphooligosaccharide--protein glycosyltransferase 48 kDa subunit precursor (EC 2.4.1.119) (Oligosaccharyl transferase 48 kDa subunit) (DDOST 48 kDa subunit). [Source:Uniprot/SWISSPROT;Acc:P39656]                                 | 2238         | 391            | -2.52                         |
| <i>IRX1</i>                                                                                                                                                     | Iroquois-class homeodomain protein IRX-1 (Iroquois homeobox protein 1) (Homeodomain protein IRXA1). [Source:Uniprot/SWISSPROT;Acc:P78414]                                                                                                        | 34           | 6              | -2.5                          |
| <i>CD4</i>                                                                                                                                                      | T-cell surface glycoprotein CD4 precursor (T-cell surface antigen T4/Leu-3). [Source:Uniprot/SWISSPROT;Acc:P01730]                                                                                                                               | 17           | 3              | -2.5                          |
| <i>Q8NAH5_HUMAN</i>                                                                                                                                             | CDNA FLJ35343 fis, clone PROST2015932. [Source:Uniprot/SPTREMBL;Acc:Q8NAH5]                                                                                                                                                                      | 17           | 3              | -2.5                          |
| <i>PSG2</i>                                                                                                                                                     | Pregnancy-specific beta-1-glycoprotein 2 precursor (PSBG-2) (Pregnancy-specific beta-1 glycoprotein E) (PS-beta-E). [Source:Uniprot/SWISSPROT;Acc:P11465]                                                                                        | 28           | 5              | -2.49                         |
| <i>THBS1</i>                                                                                                                                                    | Thrombospondin-1 precursor. [Source:Uniprot/SWISSPROT;Acc:P07996]                                                                                                                                                                                | 206          | 37             | -2.48                         |
| <i>ANKRD20A3</i>                                                                                                                                                | Ankyrin repeat domain-containing protein 20A3. [Source:Uniprot/SWISSPROT;Acc:Q5VUR7]                                                                                                                                                             | 22           | 4              | -2.46                         |

| <b>Supplementary Table 2. The list represents 222 genes decreased by more than five-fold in miR-210-tansfected cells compared with ncRNA-tansfected cells</b> |                                                                                                                                                                                                                       |              |                |                               |
|---------------------------------------------------------------------------------------------------------------------------------------------------------------|-----------------------------------------------------------------------------------------------------------------------------------------------------------------------------------------------------------------------|--------------|----------------|-------------------------------|
| <b>Gene Symbol</b>                                                                                                                                            | <b>description</b>                                                                                                                                                                                                    | <b>ncRNA</b> | <b>miR-210</b> | <b>Log<sub>2</sub>(ratio)</b> |
| <i>FNBP1L</i>                                                                                                                                                 | Formin-binding protein 1-like (Transducer of Cdc42-dependent actin assembly protein 1) (Toca-1). [Source:Uniprot/SWISSPROT;Acc:Q5TON5]                                                                                | 33           | 6              | -2.46                         |
| <i>HBB</i>                                                                                                                                                    | Hemoglobin subunit beta (Hemoglobin beta chain) (Beta-globin). [Source:Uniprot/SWISSPROT;Acc:P68871]                                                                                                                  | 22           | 4              | -2.46                         |
| <i>PIWIL3</i>                                                                                                                                                 | Piwi-like protein 3. [Source:Uniprot/SWISSPROT;Acc:Q7Z3Z3]                                                                                                                                                            | 22           | 4              | -2.46                         |
| <i>MAGEA11</i>                                                                                                                                                | Melanoma-associated antigen 11 (MAGE-11 antigen). [Source:Uniprot/SWISSPROT;Acc:P43364]                                                                                                                               | 22           | 4              | -2.46                         |
| <i>KCNGB1</i>                                                                                                                                                 | Potassium voltage-gated channel subfamily G member 1 (Voltage-gated potassium channel subunit Kv6.1) (KH2). [Source:Uniprot/SWISSPROT;Acc:Q9UIX4]                                                                     | 11           | 2              | -2.46                         |
| <i>ADRA1A</i>                                                                                                                                                 | Alpha-1A adrenergic receptor (Alpha 1A-adrenoceptor) (Alpha 1A- adrenoceptor) (Alpha-1C adrenergic receptor) (Alpha adrenergic receptor 1c). [Source:Uniprot/SWISSPROT;Acc:P35348]                                    | 11           | 2              | -2.46                         |
| <i>NP_001001343.1</i>                                                                                                                                         | MGC27121 gene (MGC27121), mRNA [Source:RefSeq_dna;Acc:NM_001001343]                                                                                                                                                   | 38           | 7              | -2.44                         |
| <i>GPNMB</i>                                                                                                                                                  | Transmembrane glycoprotein NMB precursor (Transmembrane glycoprotein HGFIN). [Source:Uniprot/SWISSPROT;Acc:Q14956]                                                                                                    | 54           | 10             | -2.43                         |
| <i>C1orf173</i>                                                                                                                                               | C1orf173 protein. [Source:Uniprot/SPTREMBL;Acc:Q6GMR8]                                                                                                                                                                | 27           | 5              | -2.43                         |
| <i>NTS</i>                                                                                                                                                    | Neurotensin/neuromedin N precursor [Contains: Large neuromedin N (NmN- 125); Neuromedin N (NmN) (NN); Neurotensin (NT); Tail peptide]. [Source:Uniprot/SWISSPROT;Acc:P30990]                                          | 27           | 5              | -2.43                         |
| <i>XKR4</i>                                                                                                                                                   | XK-related protein 4. [Source:Uniprot/SWISSPROT;Acc:Q5GH76]                                                                                                                                                           | 16           | 3              | -2.42                         |
| <i>C12orf59</i>                                                                                                                                               | C12orf59 protein. [Source:Uniprot/SPTREMBL;Acc:Q4KMG9]                                                                                                                                                                | 159          | 30             | -2.41                         |
| <i>USP29</i>                                                                                                                                                  | specific-processing protease 29) (Deubiquitinating enzyme 29). [Source:Uniprot/SWISSPROT;Acc:Q9HBJ7]                                                                                                                  | 21           | 4              | -2.39                         |
| <i>PLA2G7</i>                                                                                                                                                 | acylhydrolase) (LDL-associated phospholipase A2) (LDL-PLA(2)) (2-acetyl-1-alkylglycerophosphocholine esterase) (1-alkyl-2-acetyl-glycerophosphocholine esterase) [Source:Uniprot/SWISSPROT;Acc:Q13093]                | 21           | 4              | -2.39                         |
| <i>NP_001006656.1</i>                                                                                                                                         | MSTP119. [Source:Uniprot/SPTREMBL;Acc:Q7Z2S5]                                                                                                                                                                         | 21           | 4              | -2.39                         |
| <i>CEECAM1</i>                                                                                                                                                | cerebral endothelial cell adhesion molecule 1 [Source:RefSeq_peptide;Acc:NP_057258]                                                                                                                                   | 21           | 4              | -2.39                         |
| <i>ZDHHC22</i>                                                                                                                                                | Putative palmitoyltransferase ZDHHC22 (EC 2.3.1.-) (Zinc finger DHHC domain-containing protein 22) (DHHC-22). [Source:Uniprot/SWISSPROT;Acc:Q8N966]                                                                   | 21           | 4              | -2.39                         |
| <i>ZNF101</i>                                                                                                                                                 | Zinc finger protein 101 (Zinc finger protein HZF12). [Source:Uniprot/SWISSPROT;Acc:Q8IZC7]                                                                                                                            | 47           | 9              | -2.38                         |
| <i>ADRA1B</i>                                                                                                                                                 | Alpha-1B adrenergic receptor (Alpha 1B-adrenoceptor) (Alpha 1B- adrenoceptor). [Source:Uniprot/SWISSPROT;Acc:P35368]                                                                                                  | 26           | 5              | -2.38                         |
| <i>ACOX3</i>                                                                                                                                                  | Acyl-coenzyme A oxidase 3, peroxisomal (EC 1.3.3.6) (Pristanoyl-CoA oxidase) (Branched-chain acyl-CoA oxidase) (BRCAcox). [Source:Uniprot/SWISSPROT;Acc:O15254]                                                       | 31           | 6              | -2.37                         |
| <i>Q8N7S0_HUMAN</i>                                                                                                                                           | CDNA FLJ40424 fis, clone TESTI2039026. [Source:Uniprot/SPTREMBL;Acc:Q8N7S0]                                                                                                                                           | 31           | 6              | -2.37                         |
| <i>PHKG1</i>                                                                                                                                                  | Phosphorylase b kinase gamma catalytic chain, skeletal muscle isoform (EC 2.7.11.19) (Phosphorylase kinase subunit gamma 1). [Source:Uniprot/SWISSPROT;Acc:Q16816]                                                    | 31           | 6              | -2.37                         |
| <i>LRP5L</i>                                                                                                                                                  | low density lipoprotein receptor-related protein 5-like [Source:RefSeq_peptide;Acc:NP_872298]                                                                                                                         | 67           | 13             | -2.37                         |
| <i>AAK1</i>                                                                                                                                                   | AP2-associated protein kinase 1 (EC 2.7.11.1) (Adaptor-associated kinase 1). [Source:Uniprot/SWISSPROT;Acc:Q2M218]                                                                                                    | 221          | 43             | -2.36                         |
| <i>KIAA0195</i>                                                                                                                                               | KIAA0195 (KIAA0195), mRNA [Source:RefSeq_dna;Acc:NM_014738]                                                                                                                                                           | 40           | 8              | -2.32                         |
| <i>Q8NA59_HUMAN</i>                                                                                                                                           | CDNA FLJ35816 fis, clone TESTI2006109. [Source:Uniprot/SPTREMBL;Acc:Q8NA59]                                                                                                                                           | 30           | 6              | -2.32                         |
| <i>EMID1</i>                                                                                                                                                  | EMI domain-containing protein 1 precursor (Protein Emu1) (Emilin and multimerin domain-containing protein 1). [Source:Uniprot/SWISSPROT;Acc:Q96A84]                                                                   | 5            | 1              | -2.32                         |
| <i>C6orf122</i>                                                                                                                                               | Uncharacterized protein C6orf122. [Source:Uniprot/SWISSPROT;Acc:Q5T6M2]                                                                                                                                               | 20           | 4              | -2.32                         |
| <i>ERC1</i>                                                                                                                                                   | ELKS/RAB6-interacting/CAST family member 1 (RAB6-interacting protein 2) (ERC protein 1). [Source:Uniprot/SWISSPROT;Acc:Q8IUD2]                                                                                        | 20           | 4              | -2.32                         |
| <i>USP6</i>                                                                                                                                                   | Ubiquitin carboxyl-terminal hydrolase 6 (EC 3.1.2.15) (Ubiquitin thioesterase 6) (Ubiquitin-specific-processing protease 6) (Deubiquitinating enzyme 6) (Proto-oncogene TRE-2). [Source:Uniprot/SWISSPROT;Acc:P35125] | 20           | 4              | -2.32                         |
| <i>GRB14</i>                                                                                                                                                  | Growth factor receptor-bound protein 14 (GRB14 adapter protein). [Source:Uniprot/SWISSPROT;Acc:Q14449]                                                                                                                | 15           | 3              | -2.32                         |
| <i>ALG10</i>                                                                                                                                                  | (Asparagine-linked glycosylation protein 10 homolog A). [Source:Uniprot/SWISSPROT;Acc:Q5BKT4]                                                                                                                         | 15           | 3              | -2.32                         |
| <i>SPTB</i>                                                                                                                                                   | Spectrin beta chain, erythrocyte (Beta-I spectrin). [Source:Uniprot/SWISSPROT;Acc:P11277]                                                                                                                             | 15           | 3              | -2.32                         |
| <i>C3AR1</i>                                                                                                                                                  | [Source:Uniprot/SWISSPROT;Acc:Q16581]                                                                                                                                                                                 | 10           | 2              | -2.32                         |
| <i>HTR2C</i>                                                                                                                                                  | 5-hydroxytryptamine 2C receptor (5-HT-2C) (Serotonin receptor 2C) (5- HT2C) (5-HTR2C) (5HT-1C). [Source:Uniprot/SWISSPROT;Acc:P28335]                                                                                 | 10           | 2              | -2.32                         |
| <i>O95724_HUMAN</i>                                                                                                                                           | Reverse transcriptase (Fragment). [Source:Uniprot/SPTREMBL;Acc:O95724]                                                                                                                                                | 5            | 1              | -2.32                         |

The fifteen genes predicted as a miR-210 target gene by microCosm, TargetScan or PicTar were highlighted in gray.

**Supplementary Table 3. The list represents 811 genes predicted as a miR-210 target gene by microCosm, TargetScan and PicTar**

|                   |                  |                |                 |                  |                  |
|-------------------|------------------|----------------|-----------------|------------------|------------------|
| <i>ABCC1</i>      | <i>C10orf122</i> | <i>CD8A</i>    | <i>EFNA3</i>    | <i>GIT2</i>      | <i>IMP3</i>      |
| <i>ABCC6P2</i>    | <i>C11orf2</i>   | <i>CD99</i>    | <i>EGFL9</i>    | <i>GJA7</i>      | <i>IQCK</i>      |
| <i>ABCD1</i>      | <i>C11orf58</i>  | <i>CDC2L1</i>  | <i>EGR3</i>     | <i>GLI1</i>      | <i>IRGC</i>      |
| <i>ABCD4</i>      | <i>C11orf59</i>  | <i>CDC2L2</i>  | <i>EGR4</i>     | <i>GLIS1</i>     | <i>IRX6</i>      |
| <i>ABHD2</i>      | <i>C11orf63</i>  | <i>CDH26</i>   | <i>EHD2</i>     | <i>GLS2</i>      | <i>ISCA2</i>     |
| <i>ABL2</i>       | <i>C12orf34</i>  | <i>CDKN1C</i>  | <i>EIF3S9</i>   | <i>GNA15</i>     | <i>ISCU</i>      |
| <i>ABTB1</i>      | <i>C12orf48</i>  | <i>CDX2</i>    | <i>ELA2</i>     | <i>GNAT1</i>     | <i>ITGA8</i>     |
| <i>AC006273.1</i> | <i>C14orf148</i> | <i>CEND1</i>   | <i>ELAC2</i>    | <i>GNG3</i>      | <i>ITGB4</i>     |
| <i>AC008772.1</i> | <i>C15orf43</i>  | <i>CETN3</i>   | <i>ELFN2</i>    | <i>GNG8</i>      | <i>IWS1</i>      |
| <i>AC008898.1</i> | <i>C15orf52</i>  | <i>CFHR2</i>   | <i>ELOVL6</i>   | <i>GOLGA1</i>    | <i>JOSD2</i>     |
| <i>AC009967.5</i> | <i>C15orf62</i>  | <i>CHAD</i>    | <i>EMID1</i>    | <i>GOLGA2LY1</i> | <i>KAAG1</i>     |
| <i>AC020916.6</i> | <i>C16orf35</i>  | <i>CHD1L</i>   | <i>EML2</i>     | <i>GOLPH3</i>    | <i>KCMF1</i>     |
| <i>AC040977.2</i> | <i>C16orf70</i>  | <i>CHEK2</i>   | <i>ENPP2</i>    | <i>GPD1L</i>     | <i>KCNH5</i>     |
| <i>AC109322.1</i> | <i>C17orf57</i>  | <i>CHES1</i>   | <i>ENSA</i>     | <i>GPR153</i>    | <i>KCNMB1</i>    |
| <i>AC114498.5</i> | <i>C17orf64</i>  | <i>CHN1</i>    | <i>EPB41L1</i>  | <i>GPR17</i>     | <i>KCNN2</i>     |
| <i>AC133485.1</i> | <i>C17orf83</i>  | <i>CHRD1</i>   | <i>EPGN</i>     | <i>GPR177</i>    | <i>KCNQ2</i>     |
| <i>AC141586.2</i> | <i>C18orf10</i>  | <i>CHRM3</i>   | <i>EPHA2</i>    | <i>GPR19</i>     | <i>KIAA0664</i>  |
| <i>AC226119.1</i> | <i>C18orf34</i>  | <i>CHRN1</i>   | <i>EPHB2</i>    | <i>GPR39</i>     | <i>KIAA0748</i>  |
| <i>ACP1</i>       | <i>C19orf16</i>  | <i>CHRN2</i>   | <i>EPS15</i>    | <i>GPR87</i>     | <i>KIAA1622</i>  |
| <i>ACTA1</i>      | <i>C19orf34</i>  | <i>CHST1</i>   | <i>ERP27</i>    | <i>GRIA2</i>     | <i>KIAA1751</i>  |
| <i>ACTC1</i>      | <i>C19orf59</i>  | <i>CHST12</i>  | <i>EVL</i>      | <i>GRIK2</i>     | <i>KIAA1755</i>  |
| <i>ACTG1</i>      | <i>C1orf102</i>  | <i>CHUK</i>    | <i>EVPL</i>     | <i>GRIN3B</i>    | <i>KIAA2013</i>  |
| <i>ACTL7A</i>     | <i>C1orf110</i>  | <i>CIRBP</i>   | <i>EXOSC10</i>  | <i>GRINL1A</i>   | <i>KIF13B</i>    |
| <i>ADA</i>        | <i>C1orf111</i>  | <i>CLDN15</i>  | <i>F11R</i>     | <i>GRM5</i>      | <i>KIF20A</i>    |
| <i>ADAMTS7</i>    | <i>C1orf112</i>  | <i>CLEC11A</i> | <i>F7</i>       | <i>GRM6</i>      | <i>KIR2DL1</i>   |
| <i>ADCY7</i>      | <i>C1orf116</i>  | <i>CLEC19A</i> | <i>FAHD1</i>    | <i>GSC</i>       | <i>KLHDC4</i>    |
| <i>AGPAT2</i>     | <i>C1orf128</i>  | <i>CNGB1</i>   | <i>FAM105B</i>  | <i>GSTA1</i>     | <i>KLHL35</i>    |
| <i>AGTRAP</i>     | <i>C1orf133</i>  | <i>COL16A1</i> | <i>FAM108A1</i> | <i>GSTA2</i>     | <i>KLRA1</i>     |
| <i>AGTRL1</i>     | <i>C1orf167</i>  | <i>COL4A2</i>  | <i>FAM108A2</i> | <i>GSTTP2</i>    | <i>KLRC4</i>     |
| <i>AGXT2L2</i>    | <i>C1orf184</i>  | <i>COL4A3</i>  | <i>FAM116A</i>  | <i>GSTZ1</i>     | <i>KRTAP5-4</i>  |
| <i>AHRH</i>       | <i>C1orf86</i>   | <i>COL6A2</i>  | <i>FAM120A</i>  | <i>H2AFY</i>     | <i>LAIR2</i>     |
| <i>AIFM3</i>      | <i>C1orf88</i>   | <i>COL9A3</i>  | <i>FAM12A</i>   | <i>HAAO</i>      | <i>LAMA3</i>     |
| <i>AKAP7</i>      | <i>C1QTNF4</i>   | <i>COMMD4</i>  | <i>FAM149A</i>  | <i>HAS1</i>      | <i>LAMA5</i>     |
| <i>AKAP9</i>      | <i>C1S</i>       | <i>COX10</i>   | <i>FAM25A</i>   | <i>HCN4</i>      | <i>LAMC3</i>     |
| <i>AKR1CL2</i>    | <i>C20orf103</i> | <i>CPNE2</i>   | <i>FAM25B</i>   | <i>HDLBP</i>     | <i>LCE3E</i>     |
| <i>AL132661.1</i> | <i>C20orf195</i> | <i>CRI1</i>    | <i>FAM25C</i>   | <i>HEATR7B2</i>  | <i>LCK</i>       |
| <i>AL161662.2</i> | <i>C2orf32</i>   | <i>CREB3L3</i> | <i>FAM5B</i>    | <i>HELZ</i>      | <i>LCN8</i>      |
| <i>ALDH3A1</i>    | <i>C2orf46</i>   | <i>CRHBP</i>   | <i>FAM73B</i>   | <i>HHIP</i>      | <i>LDHB</i>      |
| <i>ALDH4A1</i>    | <i>C3orf21</i>   | <i>CRLF3</i>   | <i>FAM84A</i>   | <i>HIF3A</i>     | <i>LEAP2</i>     |
| <i>ALKBH3</i>     | <i>C3orf30</i>   | <i>CRYBA4</i>  | <i>FAM90A1</i>  | <i>HIRIP3</i>    | <i>LG3</i>       |
| <i>ALLC</i>       | <i>C4orf23</i>   | <i>CS</i>      | <i>FAM90A10</i> | <i>HIST1H1B</i>  | <i>LHPP</i>      |
| <i>AMBN</i>       | <i>C6orf125</i>  | <i>CSPP1</i>   | <i>FAM90A18</i> | <i>HIST1H2AK</i> | <i>LIPE</i>      |
| <i>ANAPC7</i>     | <i>C6orf145</i>  | <i>CST3</i>    | <i>FAM90A3</i>  | <i>HK3</i>       | <i>LIP1</i>      |
| <i>ANK1</i>       | <i>C6orf184</i>  | <i>CTBP2</i>   | <i>FAM90A7</i>  | <i>HLXB9</i>     | <i>LMAN1L</i>    |
| <i>ANKRD24</i>    | <i>C6orf191</i>  | <i>CUEDC2</i>  | <i>FAM90A8</i>  | <i>HMG20B</i>    | <i>LMTK2</i>     |
| <i>ANKRD47</i>    | <i>C6orf57</i>   | <i>CUL9</i>    | <i>FAM90A9</i>  | <i>HOXA3</i>     | <i>LMX1B</i>     |
| <i>ANKS3</i>      | <i>C9</i>        | <i>CYB5R2</i>  | <i>FAM9B</i>    | <i>HPCA</i>      | <i>LOC399947</i> |
| <i>AP000355.2</i> | <i>C9orf129</i>  | <i>CYGB</i>    | <i>FANCB</i>    | <i>HPCAL1</i>    | <i>LOC643224</i> |
| <i>AP000889.1</i> | <i>C9orf134</i>  | <i>CYP11B1</i> | <i>FANCE</i>    | <i>HRH2</i>      | <i>LRFN1</i>     |
| <i>APOBEC3G</i>   | <i>C9orf78</i>   | <i>CYP2F1</i>  | <i>FANK1</i>    | <i>HSD17B1</i>   | <i>LRP5L</i>     |
| <i>ARFRP1</i>     | <i>C9orf85</i>   | <i>DAB1</i>    | <i>FBXL12</i>   | <i>HSD17B7</i>   | <i>LRPAP1</i>    |
| <i>ARHGAP17</i>   | <i>C9orf86</i>   | <i>DARC</i>    | <i>FBXL16</i>   | <i>HSPA8</i>     | <i>LRRC62</i>    |
| <i>ARHGFEF17</i>  | <i>C9orf93</i>   | <i>DBN1</i>    | <i>FBXL17</i>   | <i>HSPBAP1</i>   | <i>LRRC68</i>    |
| <i>ARMC1</i>      | <i>CACNA2D2</i>  | <i>DCHS1</i>   | <i>FBXW5</i>    | <i>HTATSF1</i>   | <i>LRRC8A</i>    |
| <i>ARMC4</i>      | <i>CALCOCO1</i>  | <i>DCTN1</i>   | <i>FER1L4</i>   | <i>HTRA1</i>     | <i>LRRC8D</i>    |
| <i>ARSD</i>       | <i>CAMK2G</i>    | <i>DDX24</i>   | <i>FEZF1</i>    | <i>HYAL1</i>     | <i>LRRC8D</i>    |
| <i>ASCC1</i>      | <i>CAPN10</i>    | <i>DDX51</i>   | <i>FGD1</i>     | <i>IDI2</i>      | <i>LRSAM1</i>    |
| <i>ASCL1</i>      | <i>CAPN9</i>     | <i>DEAF1</i>   | <i>FGF10</i>    | <i>IGF1R</i>     | <i>LY6H</i>      |
| <i>ASL</i>        | <i>CARD9</i>     | <i>DEC1</i>    | <i>FGF18</i>    | <i>IGHA2</i>     | <i>LYN</i>       |
| <i>ATG4D</i>      | <i>CASQ1</i>     | <i>DEFB118</i> | <i>FGF22</i>    | <i>IGHV3-13</i>  | <i>LYPLA2</i>    |
| <i>ATN1</i>       | <i>CCBP2</i>     | <i>DGKA</i>    | <i>FGFRL1</i>   | <i>IGHV3-16</i>  | <i>MAG12</i>     |
| <i>ATP12A</i>     | <i>CCDC146</i>   | <i>DGKG</i>    | <i>FHIT</i>     | <i>IGHV3-23</i>  | <i>MAN1B1</i>    |
| <i>ATP1B1</i>     | <i>CCDC17</i>    | <i>DHRS3</i>   | <i>FHOD1</i>    | <i>IGHV3-35</i>  | <i>MAP6</i>      |
| <i>ATP2B3</i>     | <i>CCDC24</i>    | <i>DHX58</i>   | <i>FKBP9L</i>   | <i>IGHV3-38</i>  | <i>MAP7D1</i>    |
| <i>ATP6V0C</i>    | <i>CCDC28A</i>   | <i>DIMT1L</i>  | <i>FMO1</i>     | <i>IGHV3-47</i>  | <i>MARCH4</i>    |
| <i>AVP</i>        | <i>CCDC28B</i>   | <i>DNAH11</i>  | <i>FNTA</i>     | <i>IGHV3-66</i>  | <i>MARK1</i>     |
| <i>AVPR1B</i>     | <i>CCDC53</i>    | <i>DNAJC16</i> | <i>FOXD2</i>    | <i>IGKV4-1</i>   | <i>MAST1</i>     |
| <i>B3GALT5</i>    | <i>CCDC95</i>    | <i>DNAJC4</i>  | <i>FOXP3</i>    | <i>IGLC7</i>     | <i>MBD5</i>      |
| <i>B4GALT5</i>    | <i>CCDC97</i>    | <i>DNAJC8</i>  | <i>FRAP1</i>    | <i>IGLL3</i>     | <i>MCCD1</i>     |
| <i>B4GALT7</i>    | <i>CCKBR</i>     | <i>DPEP2</i>   | <i>FRY</i>      | <i>IGSF21</i>    | <i>MCM4</i>      |
| <i>BAIAP3</i>     | <i>CCNB1IP1</i>  | <i>DPYSL5</i>  | <i>FTSJ2</i>    | <i>IHPK2</i>     | <i>MCM8</i>      |
| <i>BCAS2</i>      | <i>CCNL2</i>     | <i>DRD5</i>    | <i>FUT8</i>     | <i>IHPK3</i>     | <i>MDGA1</i>     |
| <i>BCL2L12</i>    | <i>CCT3</i>      | <i>DTX1</i>    | <i>GOS2</i>     | <i>IKBKKG</i>    | <i>MEF2D</i>     |
| <i>BDNF</i>       | <i>CD180</i>     | <i>DUOXA1</i>  | <i>GAK</i>      | <i>IL11RA</i>    | <i>MEGF6</i>     |
| <i>BICD1</i>      | <i>CD22</i>      | <i>DUSP12</i>  | <i>GARNL1</i>   | <i>IL17RC</i>    | <i>MEIS1</i>     |
| <i>BRP44L</i>     | <i>CD276</i>     | <i>DUSP28</i>  | <i>GAS6</i>     | <i>IL18</i>      | <i>MFAP3</i>     |
| <i>BTBD10</i>     | <i>CD300LD</i>   | <i>E2F3</i>    | <i>GBGT1</i>    | <i>IL3RA</i>     | <i>MFSB4</i>     |
| <i>BX324178.1</i> | <i>CD55</i>      | <i>EBF3</i>    | <i>GDAP1L1</i>  | <i>ILVBL</i>     | <i>MID1IP1</i>   |

**Supplementary Table 3. The list represents 811 genes predicted as a miR-210 target gene by microCosm, TargetScan and PicTar**

|                    |                      |                    |                  |                 |
|--------------------|----------------------|--------------------|------------------|-----------------|
| <i>MINA</i>        | <i>PCP4</i>          | <i>RP4-565E6.1</i> | <i>SURF5</i>     | <i>WNT9B</i>    |
| <i>MLL2</i>        | <i>PCSK7</i>         | <i>RPS27</i>       | <i>SUSD1</i>     | <i>XCR1</i>     |
| <i>MPV17L</i>      | <i>PDCL</i>          | <i>RSC1A1</i>      | <i>SUZ12</i>     | <i>XKR5</i>     |
| <i>MRPL36</i>      | <i>PDE3A</i>         | <i>RUFY1</i>       | <i>SYNE2</i>     | <i>XRRA1</i>    |
| <i>MRPS30</i>      | <i>PDLIM3</i>        | <i>RUVBL2</i>      | <i>SYNGAP1</i>   | <i>YIPF3</i>    |
| <i>MS4A8B</i>      | <i>PDX1</i>          | <i>SACM1L</i>      | <i>SYT15</i>     | <i>YY1</i>      |
| <i>MT4</i>         | <i>PDZD4</i>         | <i>SAMD13</i>      | <i>TAC4</i>      | <i>Z97180.2</i> |
| <i>MUC4</i>        | <i>PEX10</i>         | <i>SAP30L</i>      | <i>TAF6</i>      | <i>ZBTB12</i>   |
| <i>MX1</i>         | <i>PEX13</i>         | <i>SARNP</i>       | <i>TBC1D16</i>   | <i>ZCCHC11</i>  |
| <i>MXD4</i>        | <i>PEX5L</i>         | <i>SCGB1C1</i>     | <i>TBC1D28</i>   | <i>ZDHHC12</i>  |
| <i>MYH11</i>       | <i>PHF15</i>         | <i>SCN1B</i>       | <i>TBC1D8</i>    | <i>ZDHHC4</i>   |
| <i>MYO15B</i>      | <i>PHF23</i>         | <i>SCN9A</i>       | <i>TCF7L2</i>    | <i>ZFPM1</i>    |
| <i>MYOHD1</i>      | <i>PHKG2</i>         | <i>SCOC</i>        | <i>TCHP</i>      | <i>ZHX2</i>     |
| <i>MYT1L</i>       | <i>PHTF1</i>         | <i>SCRT1</i>       | <i>TFAP2A</i>    | <i>ZMAT4</i>    |
| <i>NAT14</i>       | <i>P11KAP2</i>       | <i>SCYL1</i>       | <i>TFCP2</i>     | <i>ZMIZ2</i>    |
| <i>NDUFA4</i>      | <i>PIK3R5</i>        | <i>SDCCAG8</i>     | <i>TGFBRAP1</i>  | <i>ZMYM2</i>    |
| <i>NEFM</i>        | <i>PIK4CA</i>        | <i>SDF2</i>        | <i>THOC5</i>     | <i>ZMYM6</i>    |
| <i>NEK3</i>        | <i>PKNOX2</i>        | <i>SDHALP1</i>     | <i>TIAM1</i>     | <i>ZNF227</i>   |
| <i>NEUROD2</i>     | <i>PLA1A</i>         | <i>SDHALP2</i>     | <i>TIGD2</i>     | <i>ZNF274</i>   |
| <i>NEUROG3</i>     | <i>PLCB3</i>         | <i>SEC24C</i>      | <i>TIGD5</i>     | <i>ZNF397</i>   |
| <i>NFIB</i>        | <i>PLCD3</i>         | <i>SEH1L</i>       | <i>TIMM17B</i>   | <i>ZNF403</i>   |
| <i>NFIL3</i>       | <i>PLK1</i>          | <i>SENP8</i>       | <i>TIMP1</i>     | <i>ZNF418</i>   |
| <i>NKX2-5</i>      | <i>PLXNC1</i>        | <i>SEPT12</i>      | <i>TLX1</i>      | <i>ZNF45</i>    |
| <i>NKX2-8</i>      | <i>PODN</i>          | <i>SERPINA12</i>   | <i>TMEM142A</i>  | <i>ZNF462</i>   |
| <i>NOMO1</i>       | <i>POF1B</i>         | <i>SERPINA3</i>    | <i>TMEM16B</i>   | <i>ZNF467</i>   |
| <i>NOMO3</i>       | <i>POLR2I</i>        | <i>SETD2</i>       | <i>TMEM16D</i>   | <i>ZNF583</i>   |
| <i>NOX4</i>        | <i>POU2AF1</i>       | <i>SF3B1</i>       | <i>TMEM194B</i>  | <i>ZNF585B</i>  |
| <i>NP_660343.1</i> | <i>PPAP2A</i>        | <i>SF3B4</i>       | <i>TMEM195</i>   | <i>ZNF720</i>   |
| <i>NP_683701.2</i> | <i>PIIE</i>          | <i>SF3B5</i>       | <i>TMEM204</i>   | <i>ZNF827</i>   |
| <i>NPHP4</i>       | <i>PPP1CC</i>        | <i>SH2D7</i>       | <i>TMEM208</i>   | <i>ZRANB3</i>   |
| <i>NPM3</i>        | <i>PPP1R12C</i>      | <i>SH3BGR</i>      | <i>TMEM40</i>    | <i>ZSCAN20</i>  |
| <i>NPR1</i>        | <i>PPP1R16A</i>      | <i>SH3BGRL</i>     | <i>TNFRSF13C</i> |                 |
| <i>NPSR1</i>       | <i>PPP3R1</i>        | <i>SH3KBP1</i>     | <i>TNIP1</i>     |                 |
| <i>NPTX1</i>       | <i>PRHOXNB</i>       | <i>SHC3</i>        | <i>TNIP3</i>     |                 |
| <i>NQO2</i>        | <i>PRICKLE4</i>      | <i>SHCBP1</i>      | <i>TNPO3</i>     |                 |
| <i>NR6A1</i>       | <i>PRIMA1</i>        | <i>SIDT2</i>       | <i>TOM1L2</i>    |                 |
| <i>NRG4</i>        | <i>PRMT2</i>         | <i>SIL1</i>        | <i>TOR1A</i>     |                 |
| <i>NRGN</i>        | <i>PRPF38B</i>       | <i>SIN3B</i>       | <i>TP53TG3</i>   |                 |
| <i>NSDHL</i>       | <i>PRR11</i>         | <i>SIPAIL3</i>     | <i>TPST1</i>     |                 |
| <i>NSUN5</i>       | <i>PRRG2</i>         | <i>SIX1</i>        | <i>TRAFD1</i>    |                 |
| <i>NT5C1B</i>      | <i>PRSS16</i>        | <i>SLC12A8</i>     | <i>TRAV4</i>     |                 |
| <i>NT5DC1</i>      | <i>PSG2</i>          | <i>SLC15A1</i>     | <i>TRIM14</i>    |                 |
| <i>NTN4</i>        | <i>PSME3</i>         | <i>SLC16A14</i>    | <i>TRIM17</i>    |                 |
| <i>NUDT6</i>       | <i>PTAFR</i>         | <i>SLC20A1</i>     | <i>TSEN2</i>     |                 |
| <i>NUP133</i>      | <i>PTCHD3</i>        | <i>SLC25A28</i>    | <i>TSNAXIP1</i>  |                 |
| <i>NUPL2</i>       | <i>PTGES2</i>        | <i>SLC26A3</i>     | <i>TSPAN10</i>   |                 |
| <i>NUPR1</i>       | <i>PTS</i>           | <i>SLC2A1</i>      | <i>TSPAN14</i>   |                 |
| <i>NYX</i>         | <i>PYDC1</i>         | <i>SLC37A1</i>     | <i>TTC12</i>     |                 |
| <i>OAF</i>         | <i>PYY</i>           | <i>SLC38A5</i>     | <i>TTC13</i>     |                 |
| <i>OBSCN</i>       | <i>Q6ZRP6_HUMAN</i>  | <i>SLC43A1</i>     | <i>TTC24</i>     |                 |
| <i>ODF3</i>        | <i>Q9BZU2_HUMAN</i>  | <i>SLC4A11</i>     | <i>TTC4</i>      |                 |
| <i>ODZ2</i>        | <i>Q9HBR8_HUMAN</i>  | <i>SLC6A19</i>     | <i>TTF1</i>      |                 |
| <i>ODZ3</i>        | <i>RAB26</i>         | <i>SLITRK5</i>     | <i>TLL1</i>      |                 |
| <i>OGG1</i>        | <i>RAB27B</i>        | <i>SMARCA4</i>     | <i>TXNL6</i>     |                 |
| <i>OLFML2A</i>     | <i>RABGAP1L</i>      | <i>SMCHD1</i>      | <i>UBASH3A</i>   |                 |
| <i>OLIG3</i>       | <i>RAD52</i>         | <i>SORBS2</i>      | <i>UBE2O</i>     |                 |
| <i>OR10G8</i>      | <i>RALGDS</i>        | <i>SOX21</i>       | <i>UBN2</i>      |                 |
| <i>OR2T8</i>       | <i>RANBP5</i>        | <i>SOX30</i>       | <i>UBQLN1</i>    |                 |
| <i>OR2V2</i>       | <i>RASAL2</i>        | <i>SPACA3</i>      | <i>UMODL1</i>    |                 |
| <i>OR4K14</i>      | <i>RASSF1</i>        | <i>SPACA4</i>      | <i>UNC45A</i>    |                 |
| <i>OR4P1P</i>      | <i>RASSF6</i>        | <i>SPO11</i>       | <i>UNC5A</i>     |                 |
| <i>OR5M13P</i>     | <i>RBM3</i>          | <i>SPRR2F</i>      | <i>URM1</i>      |                 |
| <i>OSBPL2</i>      | <i>RBMY1C</i>        | <i>SPTB</i>        | <i>UROS</i>      |                 |
| <i>OTOS</i>        | <i>RBPJL</i>         | <i>SQLE</i>        | <i>USP21</i>     |                 |
| <i>OTP</i>         | <i>RC3H1</i>         | <i>SREBF1</i>      | <i>USP6NL</i>    |                 |
| <i>OTUB1</i>       | <i>RECK</i>          | <i>SRMS</i>        | <i>VIT</i>       |                 |
| <i>P2RX1</i>       | <i>RETN</i>          | <i>SRPX</i>        | <i>VRK1</i>      |                 |
| <i>P2RY10</i>      | <i>RG9MTD1</i>       | <i>ST3GAL3</i>     | <i>VSIG6</i>     |                 |
| <i>P2RY11</i>      | <i>RG54</i>          | <i>ST6GALNAC6</i>  | <i>VWA5B1</i>    |                 |
| <i>P4HA3</i>       | <i>RIBC2</i>         | <i>STAB1</i>       | <i>WDFY2</i>     |                 |
| <i>PABPC1L</i>     | <i>RLN3</i>          | <i>STARD3NL</i>    | <i>WDR20</i>     |                 |
| <i>PADI1</i>       | <i>RNF207</i>        | <i>STAT6</i>       | <i>WDR22</i>     |                 |
| <i>PANX3</i>       | <i>RNF208</i>        | <i>STIP1</i>       | <i>WDR38</i>     |                 |
| <i>PAOX</i>        | <i>RNF212</i>        | <i>STT3B</i>       | <i>WDR5B</i>     |                 |
| <i>PARK2</i>       | <i>RP1-163G9.1</i>   | <i>STX11</i>       | <i>WDR6</i>      |                 |
| <i>PBX1</i>        | <i>RP11-181G12.1</i> | <i>STX1B2</i>      | <i>WDR64</i>     |                 |
| <i>PCBP4</i>       | <i>RP11-191L9.1</i>  | <i>STXBP5</i>      | <i>WDR66</i>     |                 |
| <i>PCDH21</i>      | <i>RP11-397P14.1</i> | <i>SUMO3</i>       | <i>WISP2</i>     |                 |
